# Supplementary material for: Adsorption of thymine and uracil on 1 : 1 clay mineral surfaces: comprehensive ab initio study on influence of sodium cation and water
Source: Royal Society of Chemistry journal article supplement (doi:10.1039/c1cp00008j), 2011-01-01
Supplement: c1cp00008j.pdf [file c1cp00008j.pdf]

## Supplementary Information

### **Adsorption of Thymine and Uracil on 1:1 Clay Mineral Surfaces: Comprehensive *ab initio* study on Influence of Sodium Cation and Water**

**A. Michalkova, T. L. Robinson, and J. Leszczynski\***

Interdisciplinary Nanotoxicity Center, Department of Chemistry, Jackson State University,  
Jackson, MS 39217

\* Corresponding author.

Tel.: 601-979-3482; Fax: 601-979-7823

E-mail address: [jerzy@icnanotox.org](mailto:jerzy@icnanotox.org)

**Figure captions:**

**Figure 1.** The structures of small models of six member rings of the siloxane (A-D) and octahedral sheet (E and F) of the mineral of the kaolinite group used in this study.

**Figure 2.** The optimized structure of thymine adsorbed on non-hydrated tetrahedral surface of kaolinite mineral (all stable positions) obtained at the B3LYP/6-31G(d) level of theory.

**Figure 3.** The optimized structure of thymine adsorbed on non-hydrated octahedral surface of kaolinite mineral (all stable positions) obtained at the B3LYP/6-31G(d) level of theory.

**Figure 4.** The optimized structure of uracil adsorbed on hydrated tetrahedral surface of kaolinite mineral (all stable positions) obtained at the B3LYP/6-31G(d) level of theory.

**Figure 5.** The optimized structure of thymine adsorbed on hydrated tetrahedral surface of kaolinite mineral (all stable positions) obtained at the B3LYP/6-31G(d) level of theory.

**Figure 6.** The optimized structure of uracil adsorbed on hydrated octahedral surface of kaolinite mineral (all stable positions) obtained at the B3LYP/6-31G(d) level of theory.

**Figure 7.** The optimized structure of thymine adsorbed on hydrated octahedral surface of kaolinite mineral (all stable positions) obtained at the B3LYP/6-31G(d) level of theory.

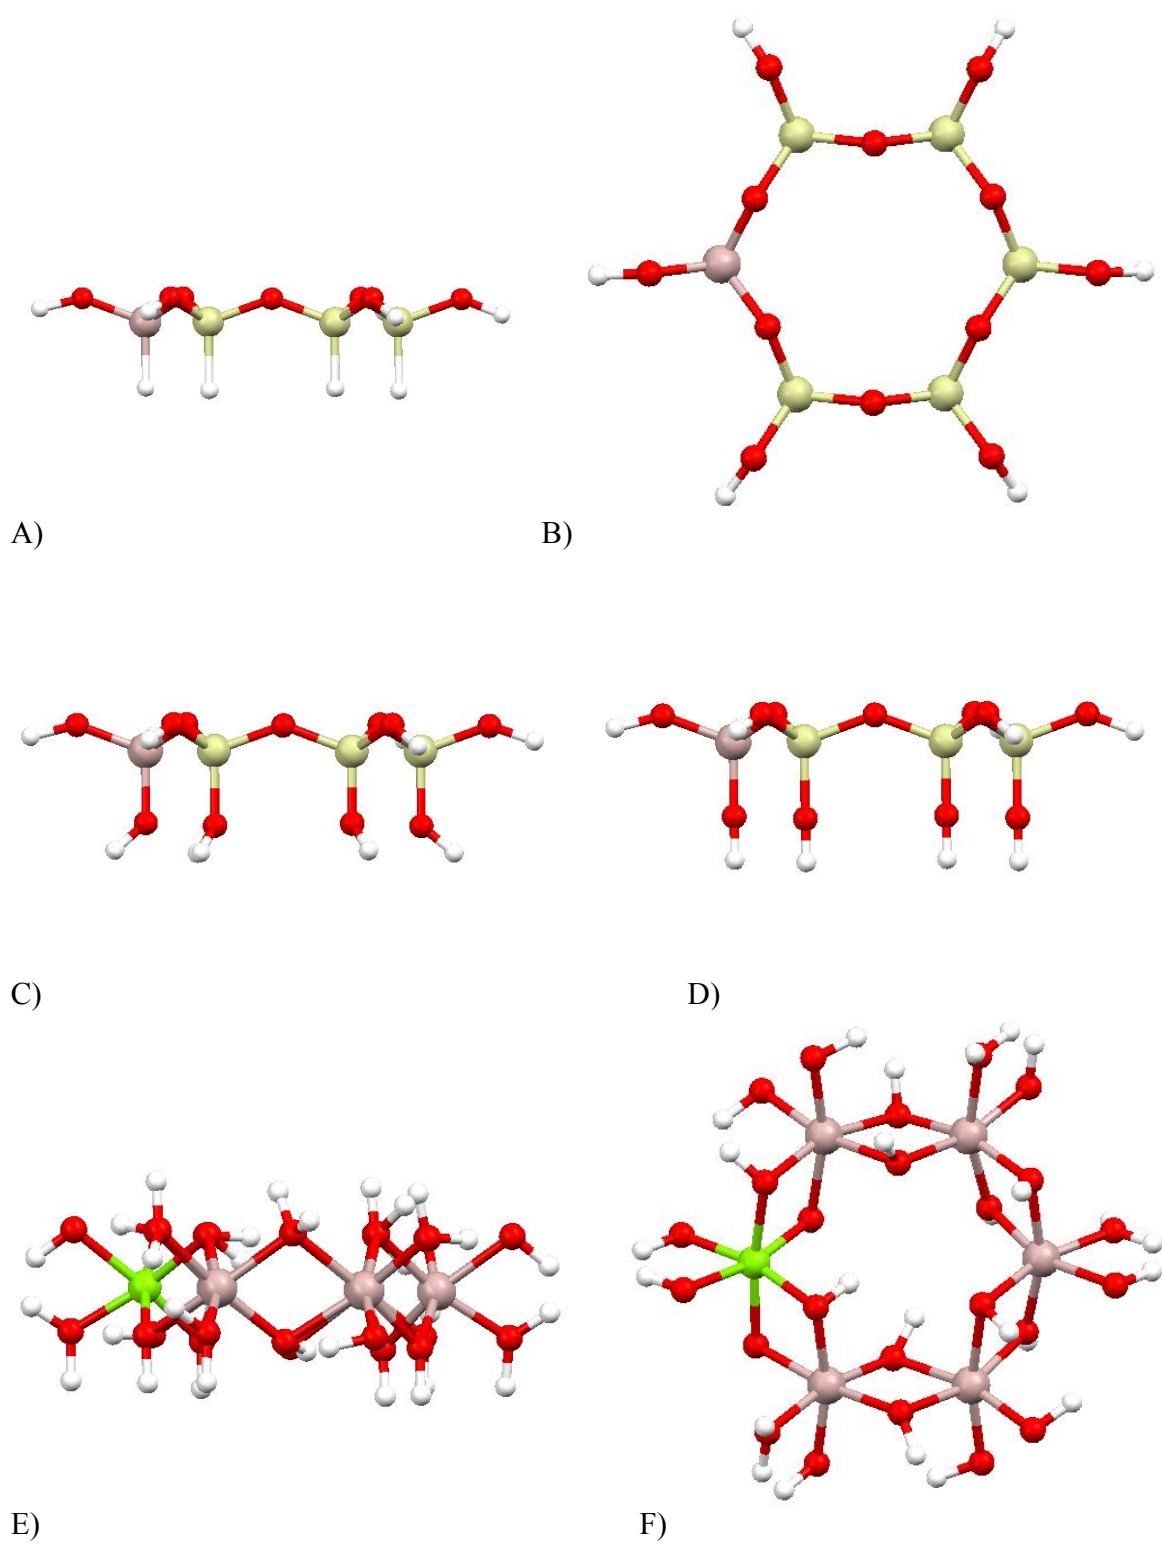

Figure 1.

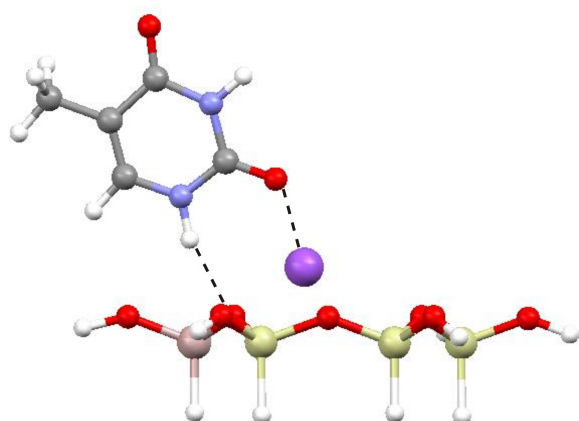

A) Na-O2(O4top)

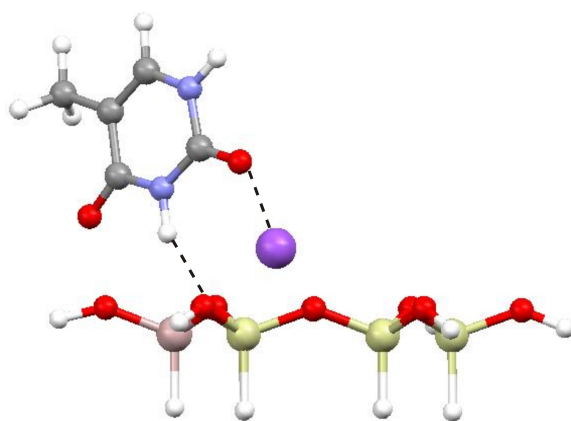

B) Na-O2

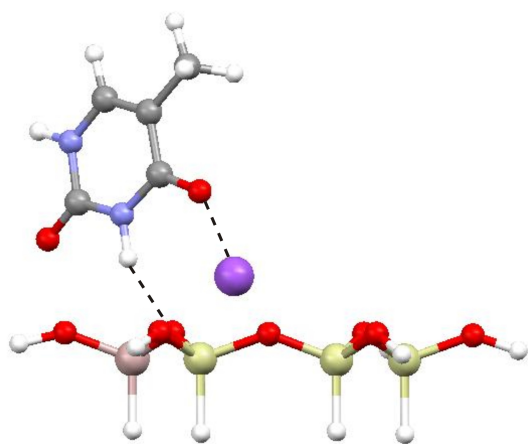

C) Na-O4

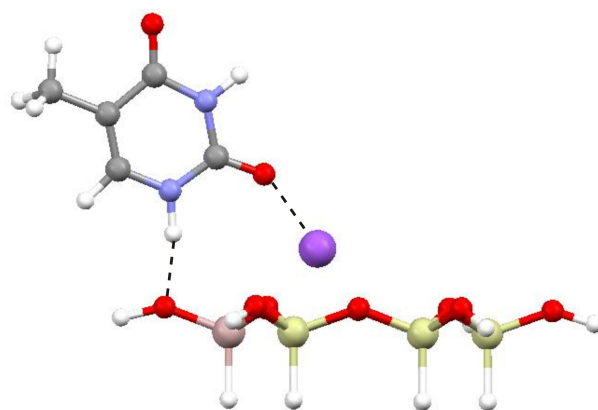

D) Na-O2(O4top)side

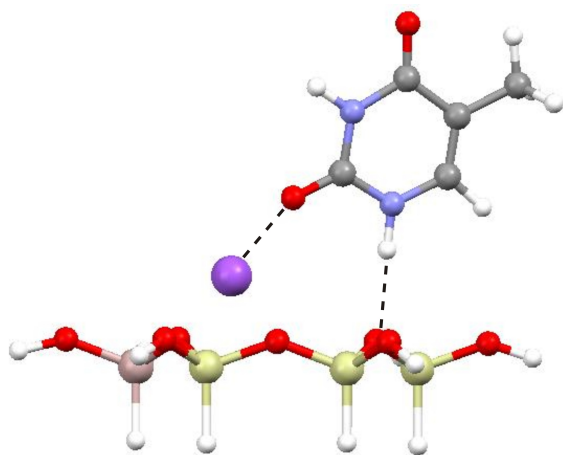

E) Na-O2-r

Figure 2.



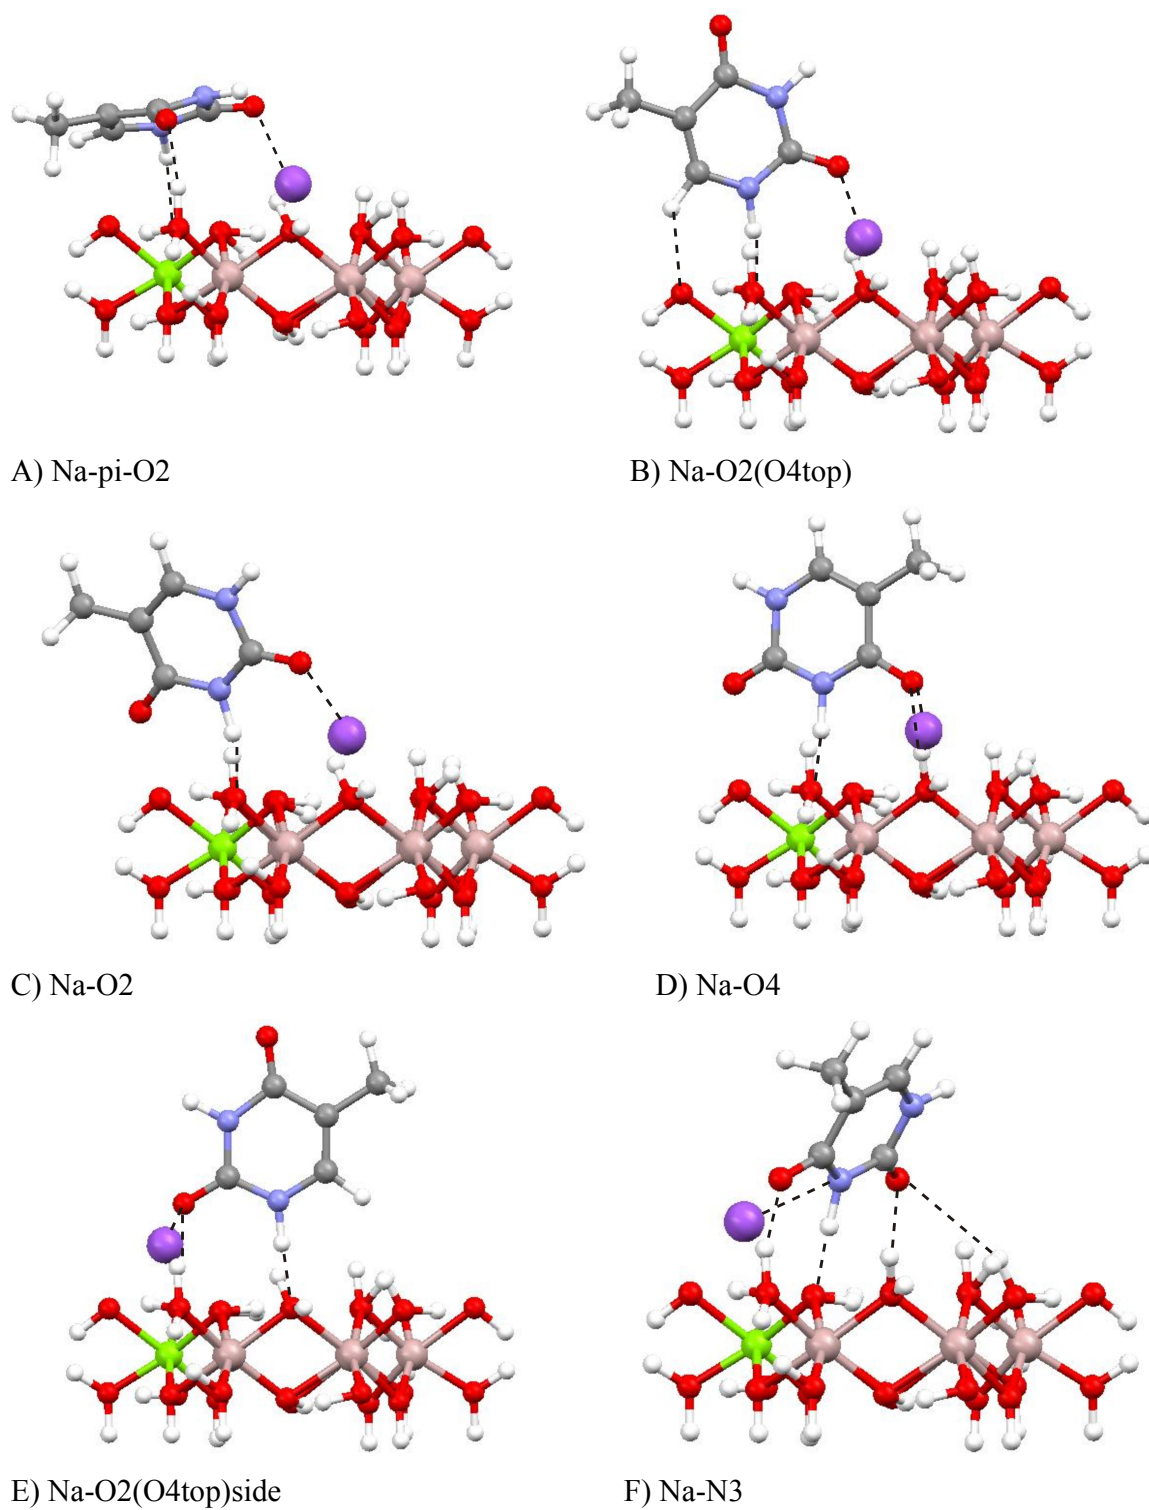

Figure 3.

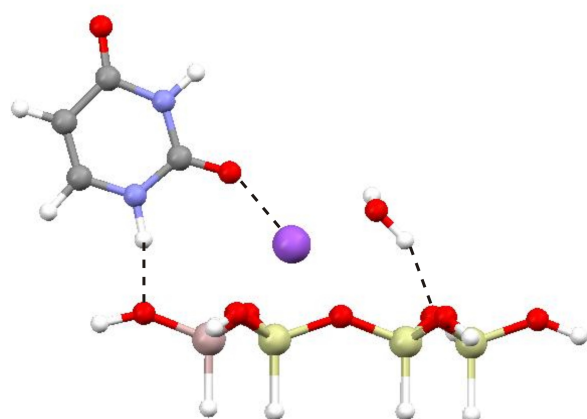

A) Na-O2(O4top)

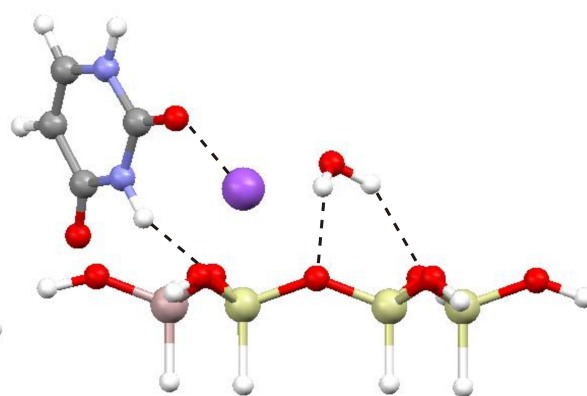

B) Na-O2

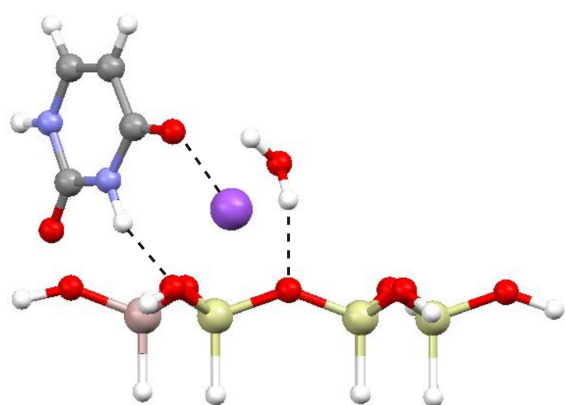

C) Na-O4

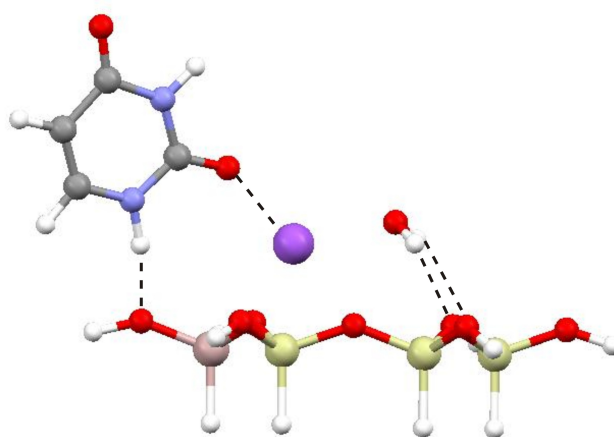

D) Na-O2(O4top)side

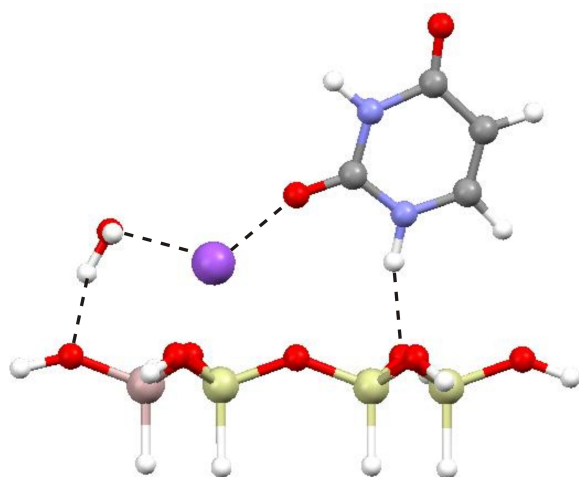

E) Na-O2-r

Figure 4.

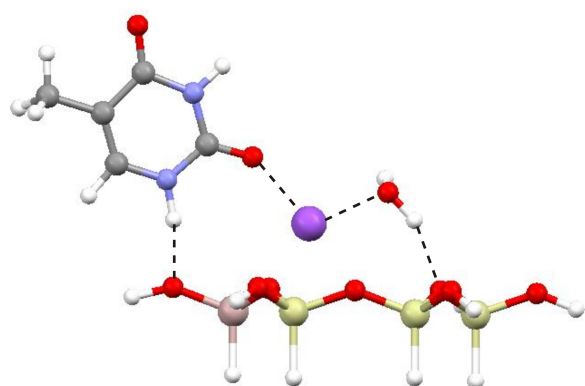

A) Na-O2(O4top)

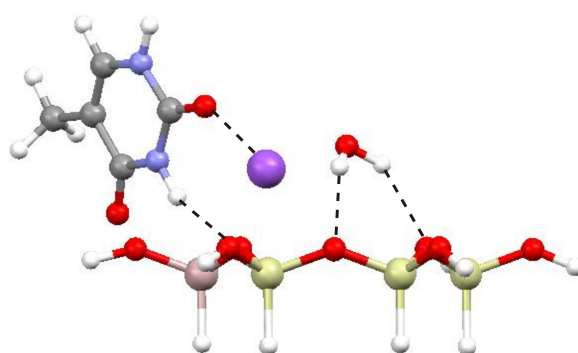

B) Na-O2

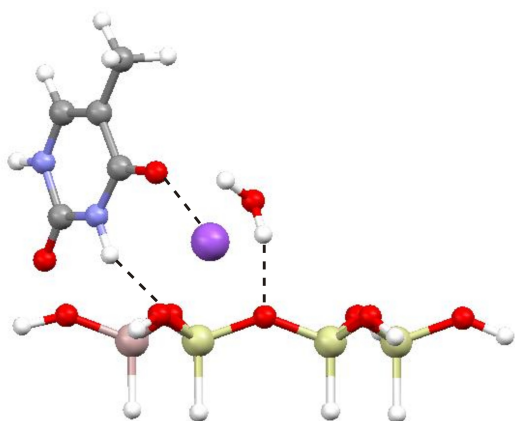

C) Na-O4

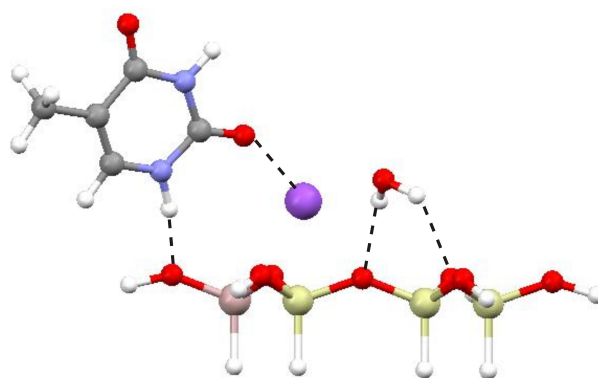

D) Na-O2(O4top)side

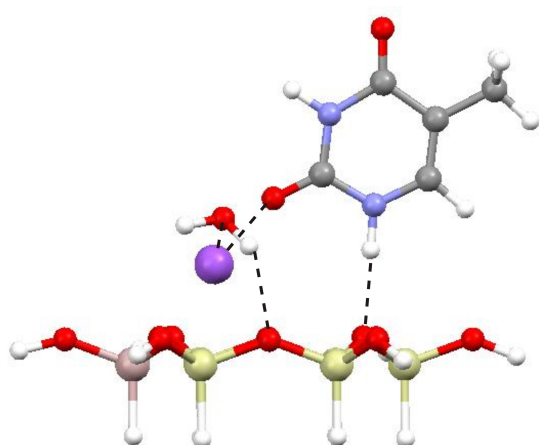

E) Na-O2-r

Figure 5.

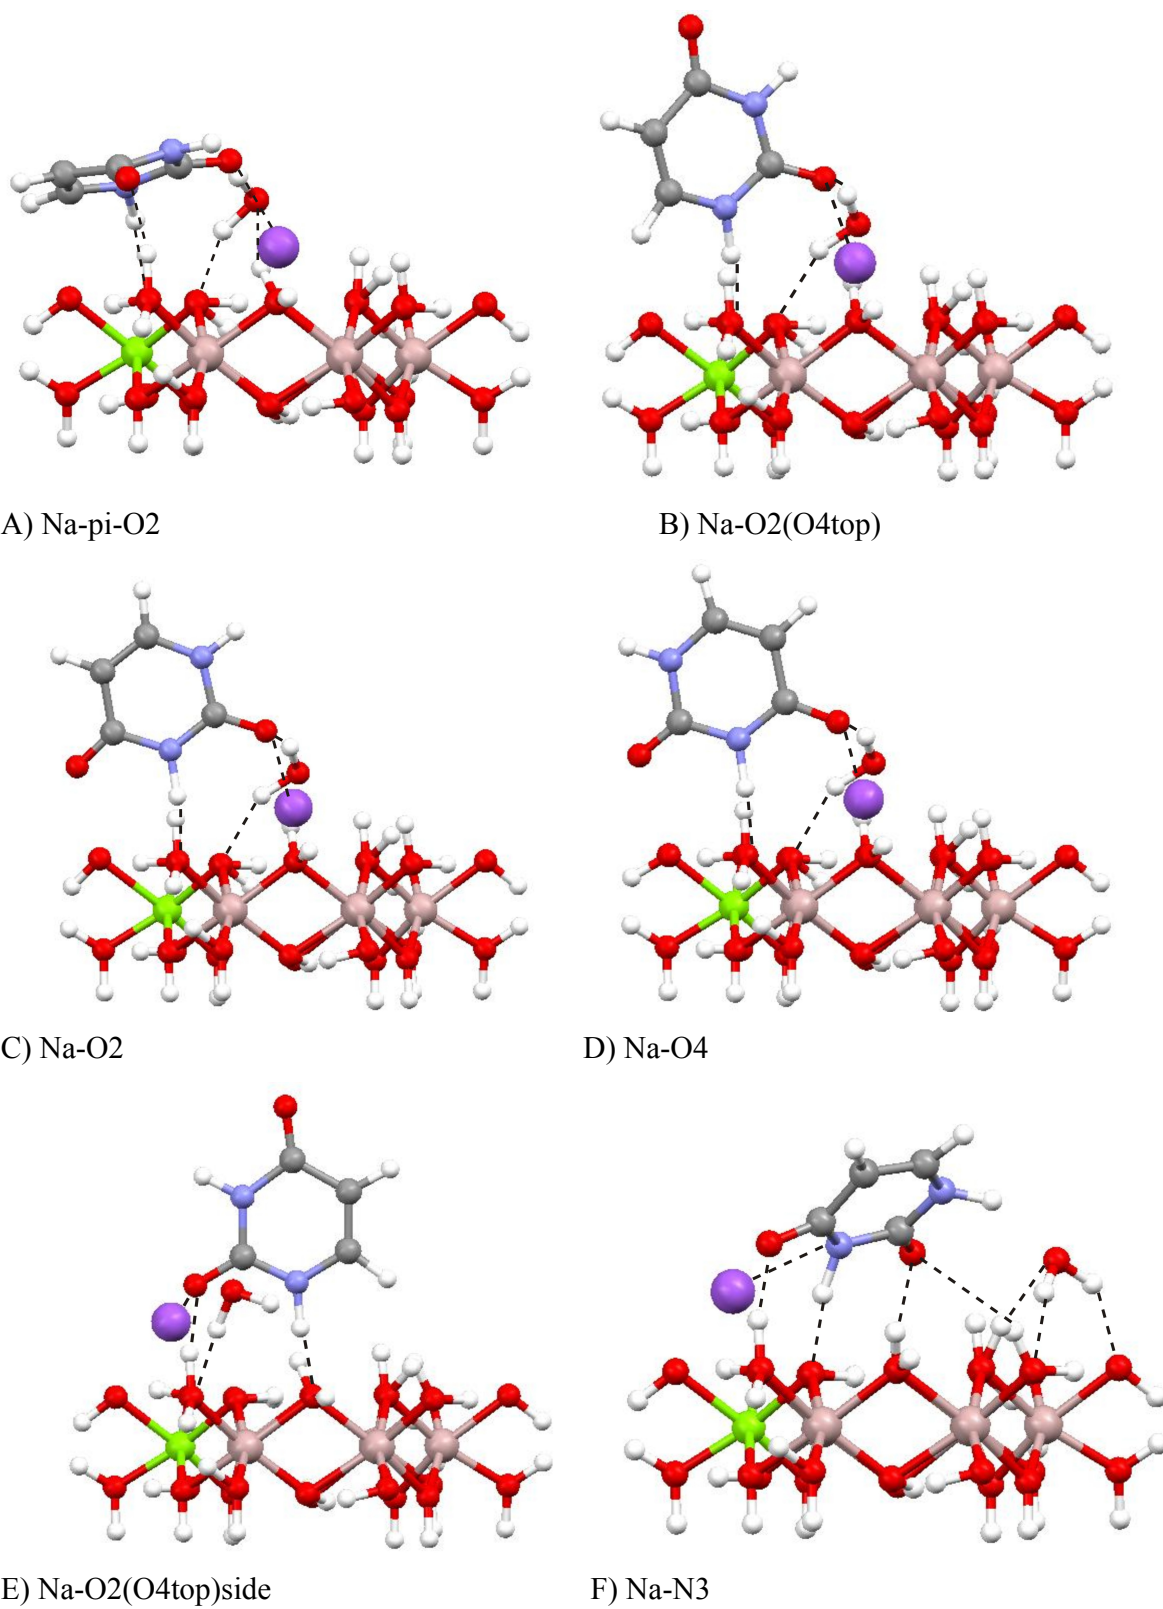

Figure 6.

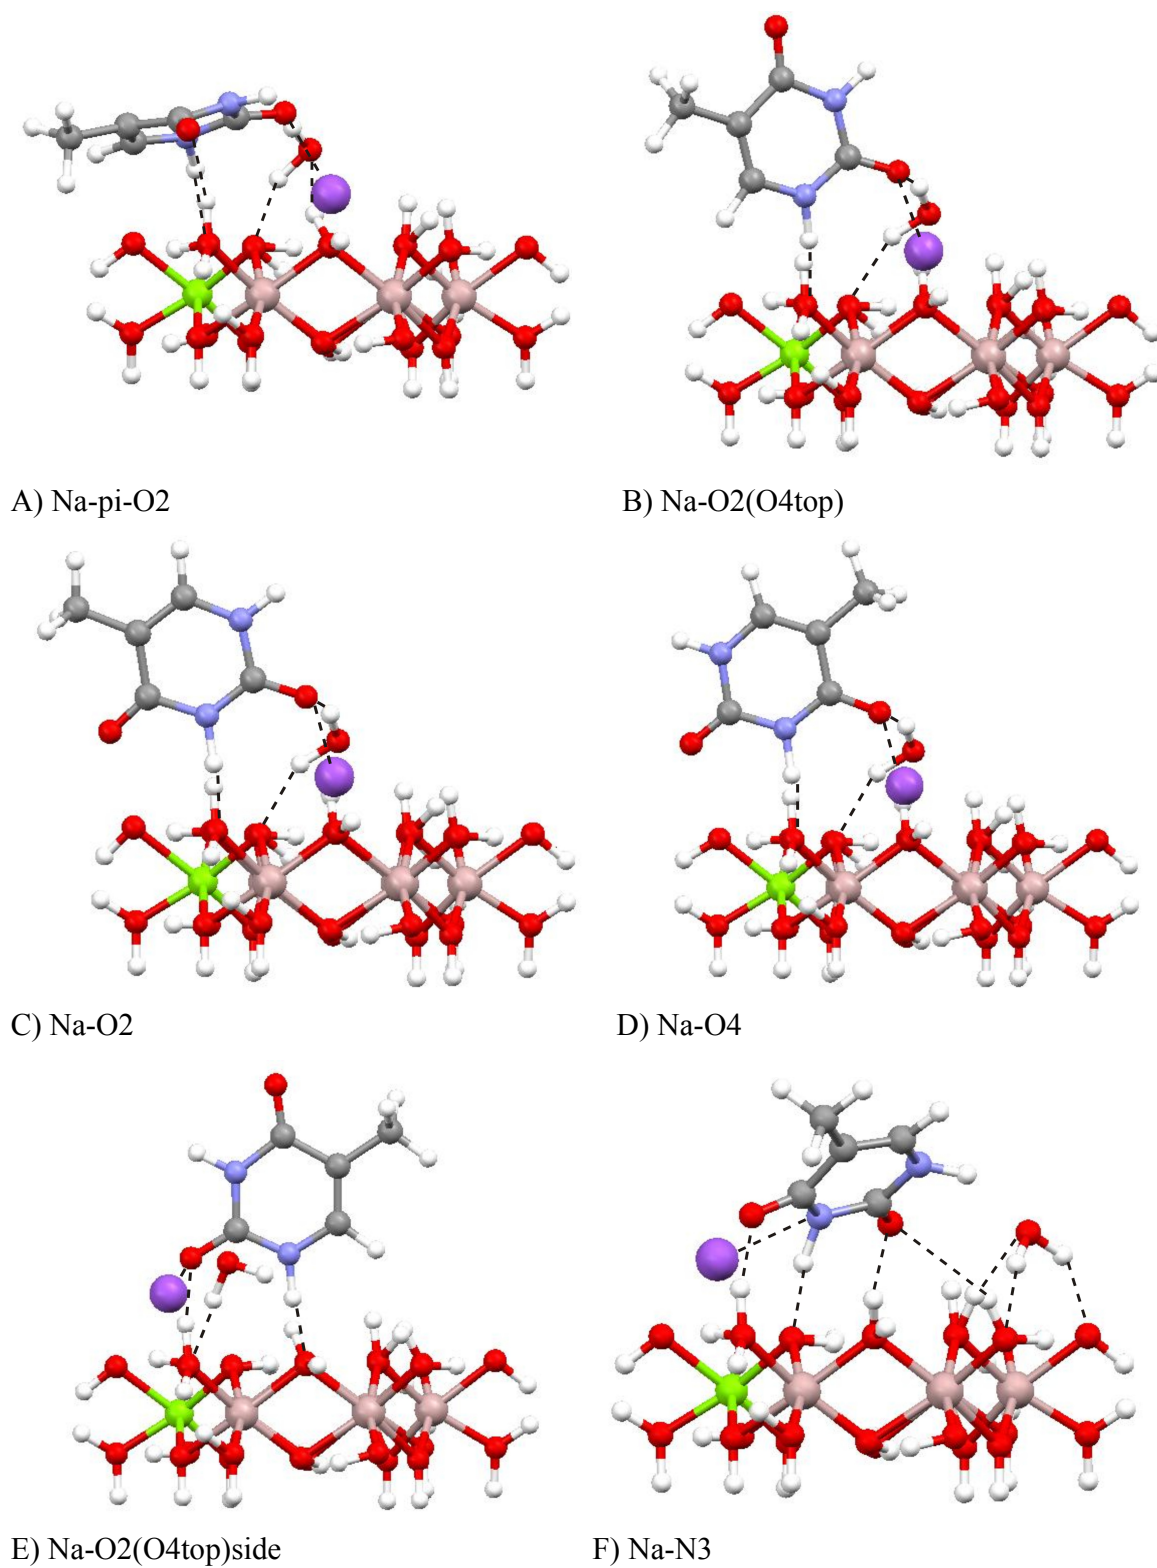

Figure 7.
